# Supplementary material
Source: PubMed Central journal article supplement (PMC6226395)
Supplement: 475347_1_En_73_MOESM2_ESM.pdf [file 475347_1_En_73_MOESM2_ESM.pdf]

**Supplementary Table 1: Mitochondrial enzyme analysis for II.1**

|                           | Measure<br>(nmol/min/mg<br>protein) | Reference range<br>(nmol/min/mg<br>protein) | % activity | % citrate<br>synthetase<br>control | % complex II<br>ratio |
|---------------------------|-------------------------------------|---------------------------------------------|------------|------------------------------------|-----------------------|
| <b>Complex I</b>          | 42                                  | 19-72                                       | 100        | 79                                 | 135                   |
| <b>Complex II</b>         | 34                                  | 26-63                                       | 76         | 58                                 |                       |
| <b>Complex II+III</b>     | 23                                  | 30-76                                       | 50         | 39                                 | 67                    |
| <b>Complex III</b>        | 16.3                                | 12.8-50.9                                   | 56         | 41                                 | 72                    |
| <b>Complex IV</b>         | 2.71                                | 3.3-9.1                                     | 41         | 32                                 | 55                    |
| <b>Citrate synthetase</b> | 167                                 | 85-179                                      | 129        |                                    |                       |

**Supplementary Table 2: Variant impact algorithm scores**

|                                      | <b>NM_020247.4:c.830T&gt;C</b> |              | <b>NG_012825.2:c.1506+1G&gt;A</b> |              |
|--------------------------------------|--------------------------------|--------------|-----------------------------------|--------------|
|                                      | <i>Prediction</i>              | <i>Score</i> | <i>Prediction</i>                 | <i>Score</i> |
| <b>Provean</b>                       | Damaging                       | -5.49        |                                   | n/a          |
| <b>phyloP 100 vertebrates</b>        |                                | 7.9019       |                                   | 9.798        |
| <b>phyloP 20 mammals</b>             |                                | 0.998        |                                   | 0.953        |
| <b>MutationAssessor</b>              | High                           | 3.5299       |                                   | n/a          |
| <b>MutationTaster</b>                | Disease-causing                |              | Disease-causing                   |              |
| <b>PolyPhen-2 (HumVar)</b>           | Probably damaging              | 0.971        |                                   | n/a          |
| <b>SIFT</b>                          | Deleterious                    | 0            |                                   | n/a          |
| <b>ClinVar clinical significance</b> | likely pathogenic              |              |                                   | n/a          |
| <b>CADD</b>                          | (phred-scaled)                 | 28           |                                   | n/a          |
| <b>MetaSVM</b>                       | Damaging                       | 0.747        |                                   | n/a          |
| <b>SNPs&amp;GO PANTHER</b>           | Disease                        | 0.978        |                                   | n/a          |
| <b>dbNSFP ADA score</b>              |                                |              |                                   | 0.9999       |

**Supplementary Table 3: Ataxia assessment for II.1 and II.2**

| Case                     |                                  | II.1          |               | II.2          |               |
|--------------------------|----------------------------------|---------------|---------------|---------------|---------------|
| Date                     |                                  | 0             | 10 months     | 0             | 10 months     |
| <b>Posture and Gait</b>  | Walking capacity                 | 2 /8          | 2 /8          | 3 /8          | 3/8           |
|                          | Gait speed                       | 1/4           | 1/4           | 1/4           | 1/4           |
|                          | Standing, eyes open              | 1/6           | 1/6           | 3/6           | 3/6           |
|                          | Stance, eyes open                | 0/4           | 0/4           | 1/4           | 0/4           |
|                          | Body sway, eyes open             | 1/4           | 1/4           | 1/4           | 1/4           |
|                          | Body sway, eyes closed           | 1/4           | 1/4           | 2/4           | 1/4           |
|                          | Quality of sitting               | 1/4           | 0/4           | 1/4           | 0/4           |
|                          | <b>TOTAL</b>                     | <b>7/34</b>   | <b>6/34</b>   | <b>12/34</b>  | <b>9/34</b>   |
|                          |                                  |               |               |               |               |
| <b>Kinetic functions</b> | Knee tibia                       | 3+3/4         | 2+2/4         | 4+3/4         | 3+3/4         |
|                          | Action tremor (heel-knee)        | 3+3/4         | 1+1/4         | 4+4/4         | 3+3/4         |
|                          | Finger nose - dysmetria          | 3+3/4         | 2+2/4         | 3+3/4         | 3+3/4         |
|                          | Finger nose – intention tremor   | 2+2/4         | 2+2/4         | 2+2/4         | 2+2/4         |
|                          | Finger-finger (action tremor)    | 2+2/4         | 1+1/4         | 2+2/4         | 2+2/4         |
|                          | Pronation-supination alternating | 2+2/4         | 2+2/4         | 2+2/4         | 2+2/4         |
|                          | Drawing Archimedes spiral        | 1/4           | 1/4           | 2/4           | 2/4           |
|                          | <b>TOTAL</b>                     | <b>31/52</b>  | <b>21/52</b>  | <b>35/52</b>  | <b>32/52</b>  |
|                          |                                  |               |               |               |               |
| <b>Speech disorders</b>  | Dysarthria - fluency             | 2/4           | 2/4           | 2/4           | 2/4           |
|                          | Dysarthria - clarity             | 0/4           | 0/4           | 0/4           | 0/4           |
|                          | <b>TOTAL</b>                     | <b>2/8</b>    | <b>2/8</b>    | <b>2/8</b>    | <b>2/8</b>    |
|                          |                                  |               |               |               |               |
| <b>Oculomotor</b>        | Gaze evoked nystagmus            | 0/3           | 0/3           | 0/3           | 0/3           |
|                          | Ocular pursuit                   | 0/2           | 0/2           | 0/2           | 0/2           |
|                          | Saccadic dysmetria               | 0/1           | 0/1           | 0/1           | 0/1           |
|                          | <b>TOTAL</b>                     | <b>0/6</b>    | <b>0/6</b>    | <b>0/6</b>    | <b>0/6</b>    |
| <b>TOTAL</b>             |                                  | <b>40/100</b> | <b>29/100</b> | <b>49/100</b> | <b>43/100</b> |
